# Supplementary material for: Boat noise interferes with Lusitanian toadfish acoustic communication
Source: Oxford University Press journal article supplement (doi:10.1242/jeb.234849), 2021-06-01
Supplement: jeb234849supp.pdf [file jeb234849supp.pdf]

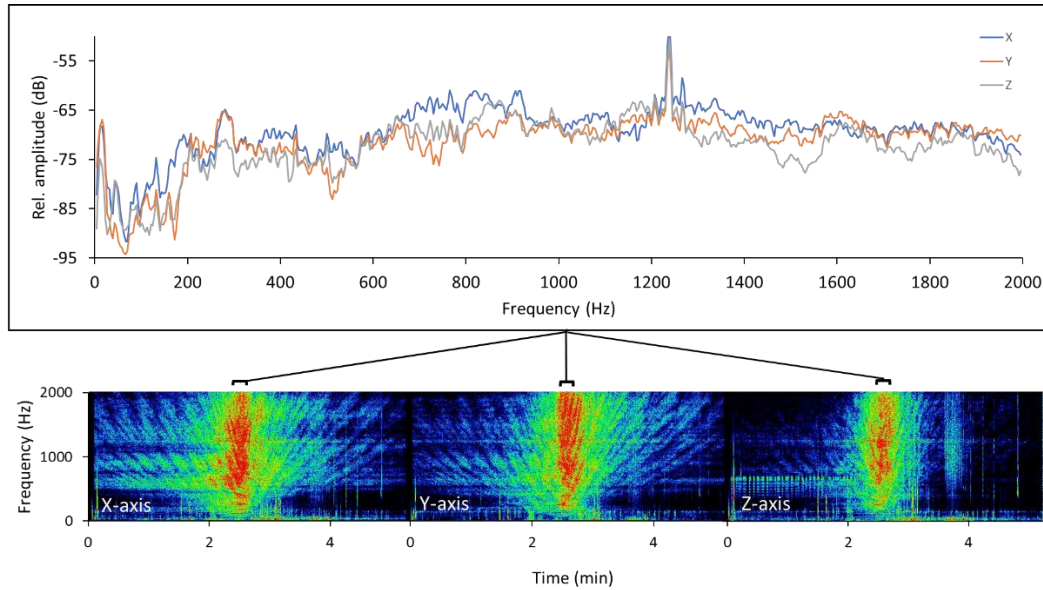

Fig. S1. Spectrograms of a ferryboat passage recorded with a 3-axis accelerometer (x,y and z axis) and power spectra of 3 seconds at the point of closest distance to the recording device. Spectra settings: sampling frequency, 4 kHz; FFT size, 1024; Hanning; window overlap, 50%.

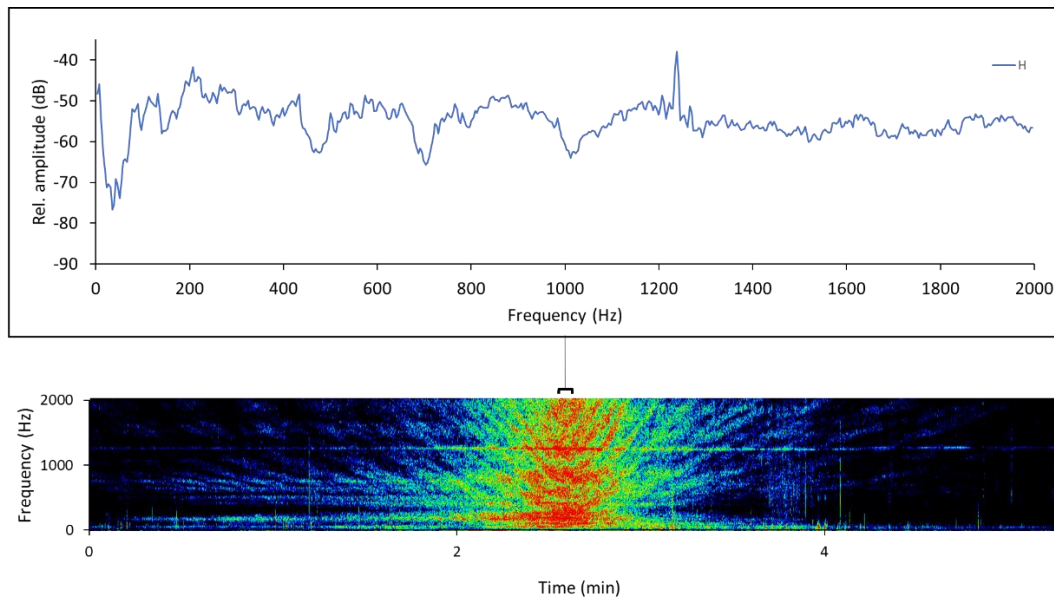

Fig. S2. Spectrograms of a ferryboat passage recorded with a hydrophone (B&K 8104) and power spectra of 3 seconds at the point of closest distance to the recording device. Spectra settings: sampling frequency, 4 kHz; FFT size, 1024; Hanning; window overlap, 50%.
